# Supplementary material for: Liposomal adhesion via electrostatic interactions and osmotic deflation increase membrane tension and lipid diffusion coefficient
Source: Royal Society of Chemistry journal article supplement (doi:10.1039/d0sm00416b), 2020-01-01
Supplement: d0sm00416b1.pdf [file d0sm00416b1.pdf]

## Supplementary information for

# **Liposomal adhesion via electrostatic interactions and osmotic deflation increases membrane tension and lipid diffusion coefficient**

Atsushi Oda<sup>1,†</sup>, Chiho Watanabe<sup>2,†</sup>, Natsumi Aoki<sup>1</sup>, and Miho Yanagisawa<sup>2,3,\*</sup>

<sup>1</sup>Department of Applied Physics, Tokyo University of Agriculture and Technology, Naka-cho 2-24-16, Koganei, Tokyo 184-8588, Japan

<sup>2</sup>Komaba Institute for Science, Graduate School of Arts and Sciences, The University of Tokyo, Komaba 3-8-1, Meguro, Tokyo 153-8902, Japan

<sup>3</sup>Department of Basic Science, Graduate School of Arts and Sciences, The University of Tokyo, Komaba 3-8-1, Meguro, Tokyo 153-8902, Japan

\*Corresponding author. E-mail: myanagisawa@g.ecc.u-tokyo.ac.jp

†Equally contributed to this work

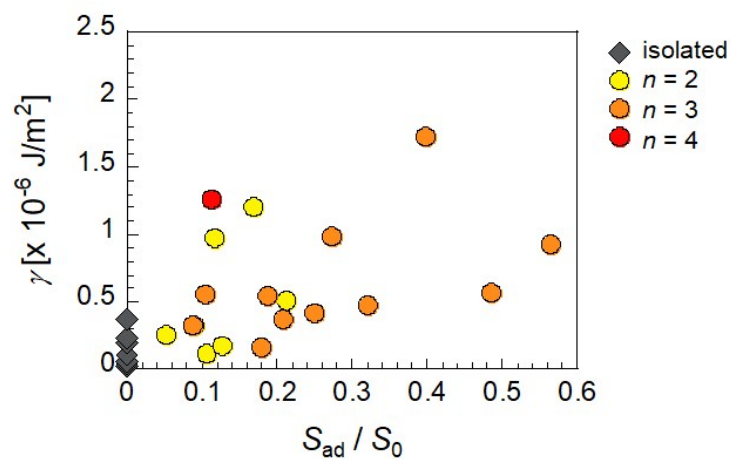

Figure S1. Membrane tension  $\gamma$  is plotted against the adhesive surface area normalized by the total surface area,  $S_{ad}/S_0$  for isolated (diamond) and adhered (circles) liposomes. The original data is the same as the one used for Fig. 3(b). The different colors of the adhered liposomes represent the number of liposomes  $n$  attached to the target liposome used in the measurement:  $n = 2$  (yellow),  $n = 3$  (orange),  $n = 4$  (red).

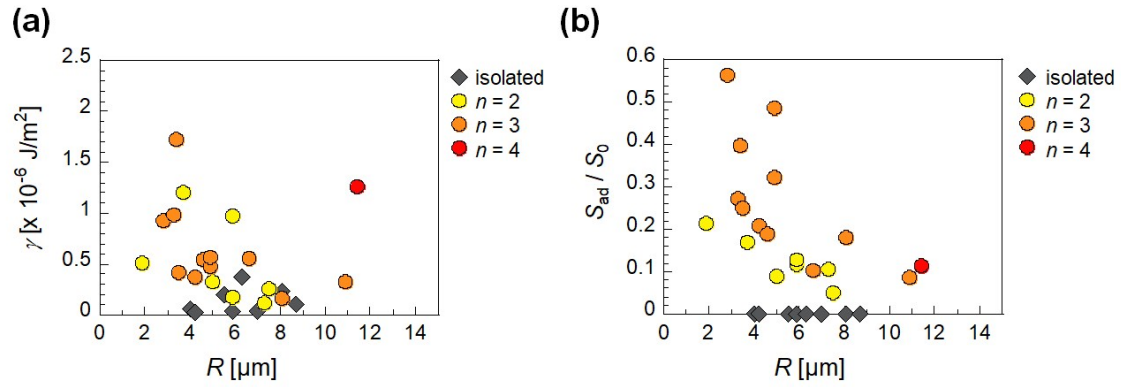

Figure S2. (a) Membrane tension,  $\gamma$  and (b) adhesive area normalized by the total surface area,  $S_{ad}/S_0$  are plotted against the radius of liposome  $R$  for isolated (diamond) and adhered (circles) liposomes, respectively. The original data is the same as the one used for Fig. 3(b). The different colors for adhered liposomes represent the number of liposomes  $n$  attached to the target liposome used for the measurement:  $n = 2$  (yellow),  $n = 3$  (orange),  $n = 4$  (red).
